# Supplementary material for: NCP pincer palladacycle as a phosphine-free catalyst precursor for the Heck–Mizoroki coupling of aryl halides
Source: Royal Society of Chemistry journal article supplement (doi:10.1039/c2ra01261h), 2012-01-01
Supplement: c2ra01261h.pdf [file c2ra01261h.pdf]

## **NCP pincer palladacycle as phosphine-free catalyst precursor for the Heck-Mizoroki coupling of aryl halides**

Gilber R. Rosa<sup>\*a</sup> and Diego S. Rosa<sup>b</sup>

<sup>a</sup>School Chemistry and Food, FURG, R. Barão do Caí, 125, Santo Antônio da Patrulha, CEP 95500-000, RS, Brazil.

<sup>b</sup>Laboratory of Molecular Catalysis, Institute of Chemistry, UFRGS, Av. Bento Gonçalves, 9500 Porto Alegre, CEP 91501-970, RS, Brazil.

Corresponding authors e-mail: [gilberrosa@furg.br](mailto:gilberrosa@furg.br)

### **Supporting Information**

#### **1- Experimental details**

All of the reactions were carried out under an argon atmosphere in an oven dried resealable Schlenk tube. All of the substrates; including CsF, K<sub>3</sub>PO<sub>4</sub>, Na<sub>2</sub>CO<sub>3</sub>, NaOAc, NEt<sub>3</sub>, DABCO, DMA and DMF, were purchased from Acros. 1,4-Dioxane, MgSO<sub>4</sub> and diethyl ether were purchased from Synth. Chemicals were used without further purification. The NMR spectra were recorded on Varian XL300 or Varian XL200 spectrometers. The Mass spectra were obtained on a GC/MS Shimadzu QP-5050 (EI, 70eV). The gas chromatography analyses were performed on a Hewlett-Packard-5890 GC with a FID and 30 m capillary column with a dimethylpolysiloxane stationary phase. Palladacycle **1** was prepared as described earlier.<sup>1</sup>

## 2- Typical experiment for the Heck coupling of aryl halides and *n*-butyl acrylate

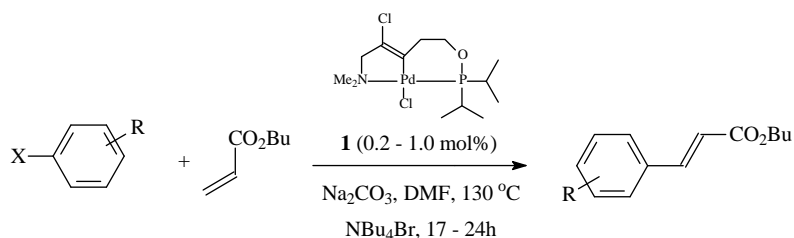

An oven-dried resealable Schlenk flask was evacuated and back-filled with argon and charged with dried  $\text{Na}_2\text{CO}_3$  (148 mg, 1.4 mmol),  $\text{NBu}_4\text{Br}$  (64 mg, 0.2 mmol), aryl halide (1 mmol), *n*-butyl acrylate (153 mg, 1.2 mmol) and NCP pincer **1** (0.8 mg, 0.2 mol % for  $\text{ArI}$ ; 2.1 mg, 0.5 mol % for  $\text{ArBr}$ ; 4.2 mg, 1.0 mol % for  $\text{ArCl}$ ). The flask was evacuated, back-filled with argon and then was added 4 mL of DMF. The reaction mixture was stirred at 130 °C until all of the starting aryl halide had been completely consumed as judged by GC. The solution was then allowed to cool to room temperature, dissolved in ether (20 mL) and was washed with a 10% aqueous solution of HCl (10 mL). The organic layer was dried over  $\text{MgSO}_4$ , filtered, concentrated in vacuum and then the crude material was purified by flash chromatography on silica gel.

**4-MeOC<sub>6</sub>H<sub>4</sub>CH=CHCO<sub>2</sub>Bu – *n*-butyl *p*-methoxycinnamate.**<sup>2</sup> Oil. <sup>1</sup>H NMR (300 MHz,  $\text{CDCl}_3$ )  $\delta$  7.66 (d, 1H), 7.48 (d, 2H), 6.91 (d, 2H,  $J_{\text{AB}} = 8.3$  Hz), 6.32 (d, 1H,  $^3J_{\text{HH}} = 16.0$  Hz), 4.21 (t, 2H), 3.84 (s, 3H), 1.68 (m, 2H), 1.44 (m, 2H), 0.97 (t, 3H). <sup>13</sup>C NMR (75.4 MHz,  $\text{CDCl}_3$ )  $\delta$  167.5, 161.5, 144.4, 129.9, 127.4, 116.0, 114.5, 64.4, 55.5, 31.0, 19.4, 13.9. GC-MS (IE, 70 eV)  $m/z$ : 234 ( $\text{M}^+$ ), 191, 178, 161, 147, 133.

**PhCH=CHCO<sub>2</sub>Bu – *n*-butyl cinnamate.**<sup>2</sup> Oil. <sup>1</sup>H NMR (200 MHz,  $\text{CDCl}_3$ )  $\delta$  7.72-7.33 (m, 6H), 6.47 (d, 1H,  $^3J_{\text{HH}} = 15.8$  Hz), 4.20 (t, 2H), 1.75-1.61 (m, 2H), 1.52-1.37 (m, 2H),

0.96 (t, 3H).  $^{13}\text{C}$  NMR (75.4 MHz,  $\text{CDCl}_3$ )  $\delta$  166.9, 144.4, 134.3, 130.0, 128.7, 127.9, 118.1, 64.2, 30.6, 19.1, 13.6.

**4-O<sub>2</sub>NC<sub>6</sub>H<sub>4</sub>CH=CHCO<sub>2</sub>Bu** – *n*-butyl *p*-nitrocinnamate.<sup>2</sup> Solid.  $^1\text{H}$  NMR (300 MHz,  $\text{CDCl}_3$ )  $\delta$  8.24 (d, 2H), 7.70 (t, 3H), 6.57 (d, 1H,  $^3J_{\text{HH}} = 15.9$  Hz), 4.25 (t, 2H), 1.75-1.66 (m, 2H), 1.51-1.39 (m, 2H), 0.97 (t, 3H).  $^{13}\text{C}$  NMR (75.4 MHz,  $\text{CDCl}_3$ )  $\delta$  165.9, 148.2, 141.4, 140.4, 128.5, 123.9, 122.4, 64.7, 30.5, 18.9, 13.5.

**4-MeC<sub>6</sub>H<sub>4</sub>CH=CHCO<sub>2</sub>Bu** – *n*-butyl *p*-methylcinnamate.<sup>2</sup> Oil.  $^1\text{H}$  NMR (300 MHz,  $\text{CDCl}_3$ )  $\delta$  7.64 (d, 1H), 7.36 (d, 2H), 7.13 (d, 2H), 6.37 (d, 1H,  $^3J_{\text{HH}} = 16.0$  Hz), 4.18 (t, 2H), 2.32 (s, 3H), 1.71-1.62 (m, 2H), 1.48-1.34 (m, 2H), 0.95 (t, 3H).  $^{13}\text{C}$  NMR (75.4 MHz,  $\text{CDCl}_3$ )  $\delta$  166.9, 144.2, 140.2, 131.5, 129.3, 127.8, 116.9, 63.9, 30.6, 21.1, 18.9, 13.5. GC-MS (IE, 70 eV)  $m/z$ : 218 ( $\text{M}^+$ ), 162, 145, 117, 115, 91.

**3-F<sub>3</sub>CC<sub>6</sub>H<sub>4</sub>CH=CHCO<sub>2</sub>Bu** – *n*-butyl *m*-trifluoromethylcinnamate.<sup>3</sup> Oil.  $^1\text{H}$  NMR (300 MHz,  $\text{CDCl}_3$ )  $\delta$  7.76-7.47 (m, 5H), 6.50 (d, 1H,  $^3J_{\text{HH}} = 15.9$  Hz), 4.22 (t, 2H), 1.74-1.65 (m, 2H), 1.50-1.40 (m, 2H), 0.97 (t, 3H).  $^{13}\text{C}$  NMR (75.4 MHz,  $\text{CDCl}_3$ )  $\delta$  166.4, 142.5, 135.2, 130.9, 129.3, 126.4, 125.5, 124.5, 120.2, 64.5, 30.6, 19.1, 13.5.

**2-MeCOC<sub>6</sub>H<sub>4</sub>CH=CHCO<sub>2</sub>Bu** – *n*-butyl *o*-methylcarbonylcinnamate.<sup>4</sup> Oil.  $^1\text{H}$  NMR (300 MHz,  $\text{CDCl}_3$ )  $\delta$  8.15 (d, 1H), 7.77-7.62 (m, 1H), 7.54-7.37 (m, 3H), 6.28 (d, 1H,  $^3J_{\text{HH}} = 16.2$  Hz), 4.23 (t, 2H), 2.55 (s, 3H), 1.74-1.69 (m, 2H), 1.45-1.41 (m, 2H), 0.96 (t, 3H).  $^{13}\text{C}$  NMR (75.4 MHz,  $\text{CDCl}_3$ )  $\delta$  195.2, 166.7, 138.4, 138.1, 137.9, 135.5, 132.7, 131.0, 128.3, 118.7, 65.8, 29.7, 29.2, 19.3, 13.7.

**4-NCC<sub>6</sub>H<sub>4</sub>CH=CHCO<sub>2</sub>Bu** – *n*-butyl *p*-cyanocinnamate.<sup>2</sup> Solid.  $^1\text{H}$  NMR (300 MHz,  $\text{CDCl}_3$ )  $\delta$  7.69-7.47 (m, 5H), 6.51 (d, 1H,  $^3J_{\text{HH}} = 16.1$  Hz), 4.21 (t, 2H), 1.68 (m, 2H), 1.44

(m, 2H), 0.95 (t, 3H).  $^{13}\text{C}$  NMR (75.4 MHz,  $\text{CDCl}_3$ )  $\delta$  166.5, 142.4, 138.9, 132.8, 128.6, 122.1, 118.6, 113.5, 65.1, 30.9, 19.4, 13.9.

**2-MeC<sub>6</sub>H<sub>4</sub>CH=CHCO<sub>2</sub>Bu** – *n*-butyl *o*-methylcinnamate.<sup>5</sup> Oil.  $^1\text{H}$  NMR (300 MHz,  $\text{CDCl}_3$ )  $\delta$  7.97 (d, 1H), 7.54 (t, 1H), 7.27-7.16 (m, 3H), 6.36 (d, 1H,  $^3J_{\text{HH}} = 15.9$  Hz), 4.21 (t, 2H), 2.41 (s, 3H), 1.73-1.64 (m, 2H), 1.49-1.39 (m, 2H), 0.96 (t, 3H).  $^{13}\text{C}$  NMR (75.4 MHz,  $\text{CDCl}_3$ )  $\delta$  166.9, 142.1, 137.4, 133.2, 130.6, 129.8, 126.2, 126.1, 119.1, 64.2, 30.6, 19.6, 19.1, 13.6.

**2,5-Me<sub>2</sub>C<sub>6</sub>H<sub>4</sub>CH=CHCO<sub>2</sub>Bu** – *n*-butyl 2,5-dimethylcinnamate.<sup>6</sup> Oil.  $^1\text{H}$  NMR (300 MHz,  $\text{CDCl}_3$ )  $\delta$  7.27 (s, 1H), 7.01 (m, 2H), 6.90 (m, 1H), 5.91 (d, 1H,  $^3J_{\text{HH}} = 15.7$  Hz), 4.15 (t, 2H), 2.34 (s, 3H), 1.61-1.55 (m, 2H), 1.53-1.44 (m, 2H), 0.94 (t, 3H).  $^{13}\text{C}$  NMR (75.4 MHz,  $\text{CDCl}_3$ )  $\delta$  167.1, 144.0, 137.6, 135.2, 133.6, 129.7, 128.1, 126.1, 120.4, 64.8, 30.3, 20.8, 19.0, 18.6, 13.7. GC-MS (IE, 70 eV)  $m/z$ : 232 ( $\text{M}^+$ ), 217, 175, 159, 145, 129, 115, 103.

**4-H<sub>2</sub>NC<sub>6</sub>H<sub>4</sub>CH=CHCO<sub>2</sub>Bu** – *n*-butyl *p*-aminocinnamate.<sup>7</sup> Oil.  $^1\text{H}$  NMR (300 MHz,  $\text{CDCl}_3$ )  $\delta$  7.64 (d, 1H), 7.44-7.40 (m, 2H), 6.64-6.61 (m, 2H), 6.33 (d, 1H,  $^3J_{\text{HH}} = 15.8$  Hz), 4.42 (s, 2H), 4.16 (t, 2H), 1.61-1.54 (m, 2H), 1.53-1.44 (m, 2H), 0.94 (t, 3H).  $^{13}\text{C}$  NMR (75.4 MHz,  $\text{CDCl}_3$ )  $\delta$  167.1, 147.8, 146.7, 129.4, 126.3, 123.9, 114.8, 64.8, 30.3, 18.6, 13.7.

**4-MeCOC<sub>6</sub>H<sub>4</sub>CH=CHCO<sub>2</sub>Bu** – *n*-butyl *p*-acethylcinnamate.<sup>2</sup> Oil.  $^1\text{H}$  NMR (300 MHz,  $\text{CDCl}_3$ )  $\delta$  7.96 (d, 2H), 7.68 (d, 1H), 7.60 (d, 2H,  $J_{\text{AB}} = 8.5$  Hz), 6.54 (d, 1H,  $J_{\text{HH}} = 16.1$  Hz), 4.21 (t, 2H), 2.60 (s, 3H), 1.69 (m, 2H), 1.45 (m, 2H), 0.96 (t, 3H).  $^{13}\text{C}$  NMR (75.4

MHz, CDCl<sub>3</sub>) δ 197.5, 166.7, 143.1, 139.0, 138.2, 129.0, 128.3, 121.0, 64.8, 30.9, 26.8, 13.9. GC-MS (IE, 70 eV) m/z: 246 (M<sup>+</sup>), 190, 175, 147, 131, 115, 102.

**4-MeOC<sub>6</sub>H<sub>4</sub>CH=CHPh – *p*-methoxystilbene.**<sup>2</sup> Solid. <sup>1</sup>H NMR (200 MHz, CDCl<sub>3</sub>) δ 7.48 (d, 2H), 7.43 (d, 2H), 7.27 (t, 2H), 7.18 (t, 1H), 7.02 (d, 1H, *J*<sub>HH</sub> = 16.0 Hz), 6.89 (d, 1H), 6.81 (d, 2H), 3.83 (s, 3H). <sup>13</sup>C NMR (75.4 MHz, CDCl<sub>3</sub>) δ 160.5, 137.3, 129.8, 129.7, 128.4, 127.8, 127.5, 127.3, 114.4, 55.2. GC-MS (IE, 70 eV) m/Z: 210 (M<sup>+</sup>), 195, 179, 165, 152, 89, 76, 63, 51.

## References

1. G. R. Rosa, G. Ebeling, J. Dupont and A. L. Monteiro, *Synthesis*, 2003, 2894.
2. N. Iranpoor, H. Firouzabadi, A. Tarassoli and M. Fereidoonhezad, *Tetrahedron*, 2010, **66**, 2415.
3. X. Cui, Z. Li, C. Tao, Y. Xu, J. Li, L. Liu and Q. X. Guo, *Org. Lett.*, 2006, **8**, 2467.
4. F. W. Patureau, T. Besset and F. Glorius, *Angew. Chem. Int. Ed.*, 2011, **50**, 1064.
5. H. Firouzabadi, N. Iranpoor and M. Gholinejad, *Tetrahedron*, 2009, **65**, 7079.
6. G. Zou, W. Huang, Y. Xiao and J. Tang, *New J. Chem.*, 2006, **30**, 803.
7. D. Yang, Y. Chen and N. Zhu, *Org. Lett.*, 2004, **6**, 1577.
